# Supplementary material
Source: HighWire-hosted journal article supplement (https://mh.bmj.com/content/49/4/700)
Supplement: inline-supplementary-material-2 [file inline-supplementary-material-2.pdf]

## Supplementary File 2

## An example from the coding process

| Initial codes                                                                                                                                                                                                                                                             | Cluster codes                                                                               | Sub-categories                        | Category                                        |
|---------------------------------------------------------------------------------------------------------------------------------------------------------------------------------------------------------------------------------------------------------------------------|---------------------------------------------------------------------------------------------|---------------------------------------|-------------------------------------------------|
| Providing health education<br>Patients not trusting diagnosis<br>Patients not trusting treatment<br>Convincing patients of treatment                                                                                                                                      | Providing health education<br>Building patients' trust in treatment                         | Patient counselling                   | Health professionals' strategies to reduce pain |
| Seeking the cause of pain<br>Difficulties understanding pain<br>Not trusting patients' self-report<br>Presence of pain corresponding with vital signs                                                                                                                     | Determining cause of pain<br>Trusting in vital signs                                        | Understanding the patients' pain      |                                                 |
| Providing antipain so no other treatment is needed<br>Providing analgesics fulfills expectations<br>Medical staff (only) uses analgesics<br>Lack of considering other treatment options<br>Patients can pray at home<br>Patients can use non-pharmacological care at home | Prioritizing treatment with analgesics<br>Considering non-pharmacological care as home care | Providing (non-) pharmacological care |                                                 |
