# Supplementary material
Source: HighWire-hosted journal article supplement (https://mh.bmj.com/content/49/4/700)
Supplement: inline-supplementary-material-3 [file inline-supplementary-material-3.pdf]

## Supplementary File 3

## Consolidated Criteria for Reporting Qualitative Research (COREQ)

| No. Item                                       | Manuscript section                                                                | Page number(s) |
|------------------------------------------------|-----------------------------------------------------------------------------------|----------------|
| <b>Domain 1: Research Team and Reflexivity</b> |                                                                                   |                |
| <i>Personal Characteristics</i>                |                                                                                   |                |
| 1. Interviewer/facilitator                     | Methods: Data collection, Context of the researcher                               | 9 & 10         |
| 2. Credentials                                 | Title page, Methods: Context of the researcher                                    | 1 & 2/ 9       |
| 3. Occupation                                  | Title page, Methods: Context of the researcher                                    | 1 & 2/ 9       |
| 4. Gender                                      | Title page, Methods: Context of the researcher                                    | 1/ 9           |
| 5. Experience and training                     | Title page, Methods: Data analysis, Context of the researcher                     | 1 & 2/ 9-11    |
| <i>Relationship with Participants</i>          |                                                                                   |                |
| 6. Relationship with participants              | Methods: Data collection, Context of the researcher                               | 9 -& 10        |
| 7. Participant knowledge of the interviewer    | Methods: Data collection, Ethical considerations (Suppl. File 1)                  | 10 & 11        |
| 8. Interviewer characteristics                 | Methods: Context of the researcher                                                | 9              |
| <b>Domain 2: Study design</b>                  |                                                                                   |                |
| <i>Theoretical framework</i>                   |                                                                                   |                |
| 9. Methodological Orientation and Theory       | Methods: Data analysis                                                            | 10 & 11        |
| <i>Participant Selection</i>                   |                                                                                   |                |
| 10. Sampling                                   | Methods: Sampling                                                                 | 7 & 8          |
| 11. Method of approach                         | Methods: Sampling                                                                 | 7 & 8          |
| 12. Sample Size                                | Methods: Data collection                                                          | 10             |
| 13. Non-participation                          | Not applicable                                                                    |                |
| <i>Setting</i>                                 |                                                                                   |                |
| 14. Setting of data collection                 | Methods: Setting (Figure 2)                                                       | 8 & 9          |
| 15. Presence of non-participants               | Methods: Data collection                                                          | 10             |
| 16. Description of sample                      | Findings                                                                          | 12-13          |
| <i>Data Collection</i>                         |                                                                                   |                |
| 17. Interview guide                            | Methods: Data collection (Suppl. File 1)                                          | 10             |
| 18. Repeat interviews                          | Methods: Rigor (member checking)                                                  | 11 & 12        |
| 19. Audio/visual recording                     | Methods: Data collection, Rigor                                                   | 10 -12         |
| 20. Field notes                                | Methods: Data analysis, Rigor                                                     | 10 & 12        |
| 21. Duration                                   | Methods: Data collection                                                          | 10             |
| 22. Data saturation                            | Methods: Sampling; Strengths and limitations                                      | 7 & 8, 32      |
| 23. Transcripts returned                       | Not Applicable                                                                    |                |
| <b>Domain 3: Analysis and Findings</b>         |                                                                                   |                |
| <i>Data Analysis</i>                           |                                                                                   |                |
| 24. Number of data coders                      | Methods: Data analysis                                                            | 10 & 11        |
| 25. Description of coding tree                 | Methods: Data analysis; Findings: overview of the model (Figure 3), Suppl. File 2 | 10 – 13        |
| 26. Derivation of themes                       | Methods: Data analysis; Findings                                                  | 10 & 13        |
| 27. Software                                   | Methods: Data analysis                                                            | 11             |

|                                  |                                                 |         |
|----------------------------------|-------------------------------------------------|---------|
| 28. Participant checking         | Methods: Rigor (member checking)                | 11 & 12 |
| <i>Reporting</i>                 |                                                 |         |
| 29. Quotations presented         | Findings                                        | 15 - 26 |
| 30. Data and findings consistent | Findings; Discussion; Conclusion                | 13 - 34 |
| 31. Clarity of major themes      | Findings: overview of the model (core category) | 13 & 14 |
| 32. Clarity of minor themes      | Findings                                        | 13 - 26 |
